# Supplementary material for: Evaluation of the Xanthan-Based Film Incorporated with Silver Nanoparticles for Potential Application in the Nonhealing Infectious Wound
Source: Hindawi journal article supplement (doi:10.1155/2017/6802397), 2017-01-01
Supplement: f1 [file 6802397.f1.docx]

**Evaluation of the xanthan-based film incorporated with silver nanoparticles for potential application in the non-healing infectious wound**

Jinjian Huang1,3, Jianan Ren1#, Guopu Chen1,2, Youming Deng1,2 , Gefei Wang1 , Xiuwen Wu1

1 Department of Surgery, Jinling Hospital,

2Medical School of Nanjing University,

3 Medical School of Southeast University,

First author: Jinjian Huang, Email: 932840102@qq.com

Co-author: Guopu Chen, Email: 943447100@qq.com

Co-author: Youming Deng, Email: [dymkingdom@163.com](mailto:dymkingdom@163.com)

Co-author: Gefei Wang, Email: [wgfwang@gmail.com](mailto:wgfwang@gmail.com)

Co-author: Xiuwen Wu, Email: LYGWXW@163.COM

# Corresponding author

Department of Surgery, Jinling Hospital, 305 East Zhongshan Road, Nanjing, 210002,

China,

Mobile Phone: +08613605169808,

Fax: +0862580860376,

Email:JiananR@gmail.com


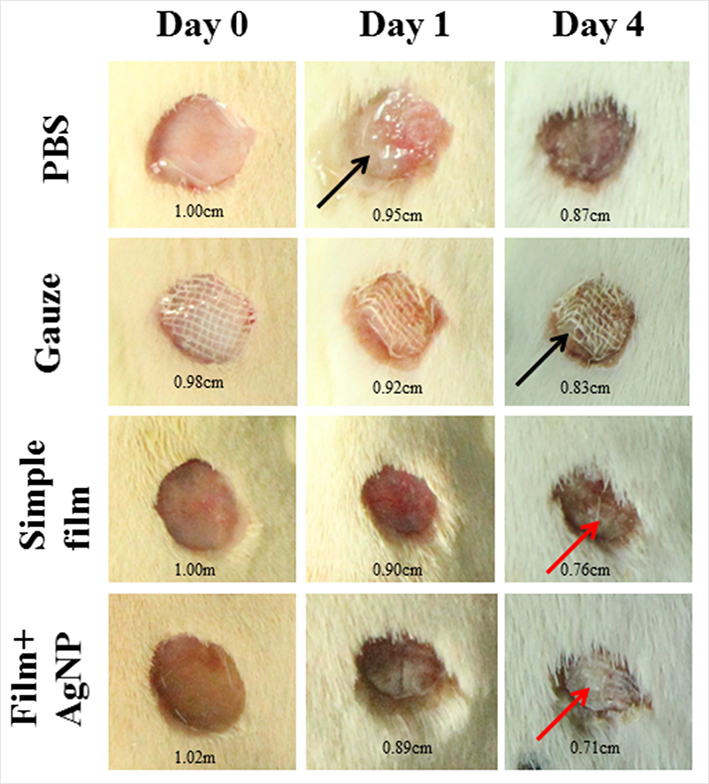


Fig S1. Photographs of infectious wounds on the day 0, day 1 and day 4 after different treatments (black arrows: pus, red arrows: film fragment).


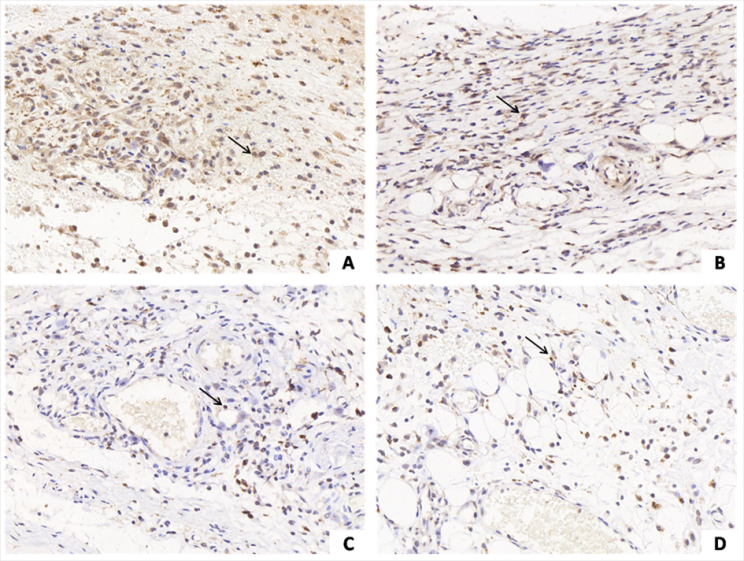


Fig S2. Results of IL-6 immunohistochemical staining (black arrows: IL-6 positive cells), 200×. A) PBS group; B) gauze group; C) simple film group; D) film + AgNP group.


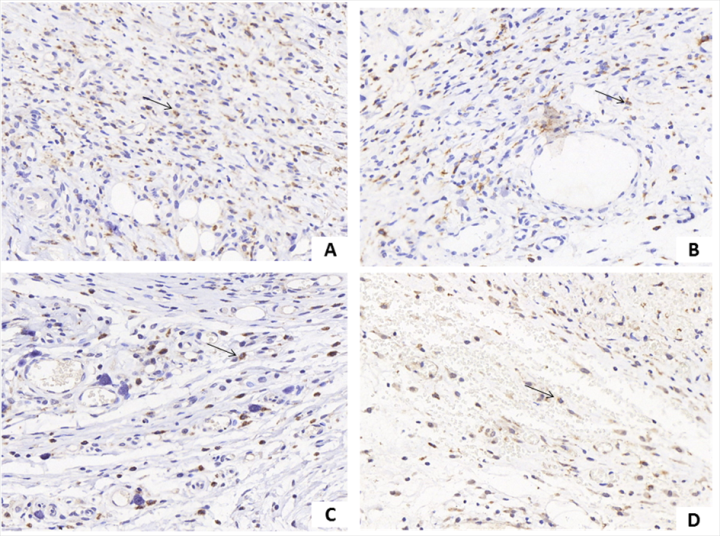


Fig S3. Results of TNF-α immunohistochemical staining (black arrows: TNF-α positive cells), 200×. A) PBS group; B) gauze group; C) simple film group; D) film + AgNP group.


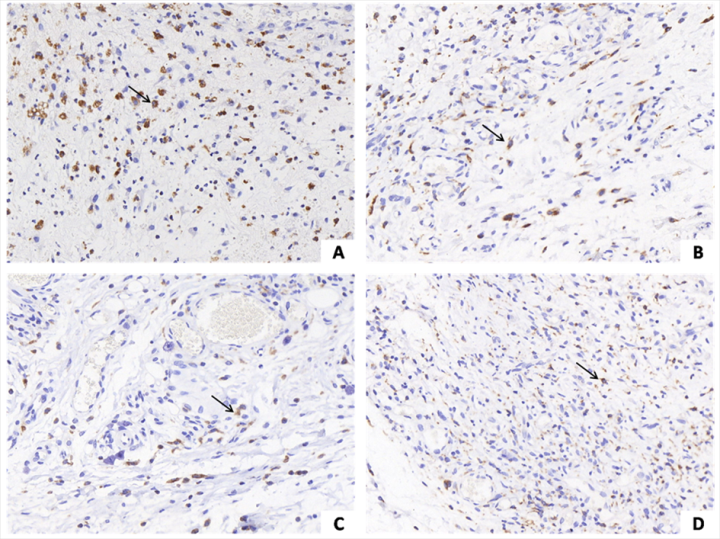


Fig S4. Results of CD68 immunohistochemical staining (black arrows: macrophages), 200×. A) PBS group; B) gauze group; C) simple film group; D) film + AgNP group.
